# Supplementary material for: Hierarchical porous Ni@boehmite/nickel aluminum oxide flakes with enhanced microwave absorption ability
Source: Royal Society of Chemistry journal article supplement (doi:10.1039/c7cp00629b), 2017-01-01
Supplement: c7cp00629b1.pdf [file c7cp00629b1.pdf]

## **Hierarchical porous Ni@boehmite/nickel aluminum oxide flakes with enhanced microwave absorption ability**

Biao Zhao,<sup>a, b, \*</sup> Junwei Liu,<sup>a</sup> Xiaoqin Guo,<sup>a</sup> Wangyu Zhao,<sup>b</sup> Luyang Liang,<sup>a</sup> Chao

Ma,<sup>b</sup> Rui Zhang,<sup>a, \*</sup>

<sup>a</sup> Henan Key Laboratory of Aeronautical Materials and Application Technology,  
School of Mechatronics Engineering, Zhengzhou University of Aeronautics,  
Zhengzhou, Henan 450046, China

<sup>b</sup> *Department of Mechanical and Industrial Engineering, University of Toronto, 5  
King's College Road, Toronto, Ontario M5S 3G8, Canada*

<sup>c</sup> School of Materials Science and Engineering, Zhengzhou University, Zhengzhou,  
Henan 450001, PR China

**\* Corresponding Author:**

Dr. Biao Zhao

E-mail address: biao\_zhao@zzia.edu.cn

Prof. Rui Zhang

E-mail address: zhangray@zzia.edu.cn

Tel: +86-371-60632007

Fax: +86-371-60632600

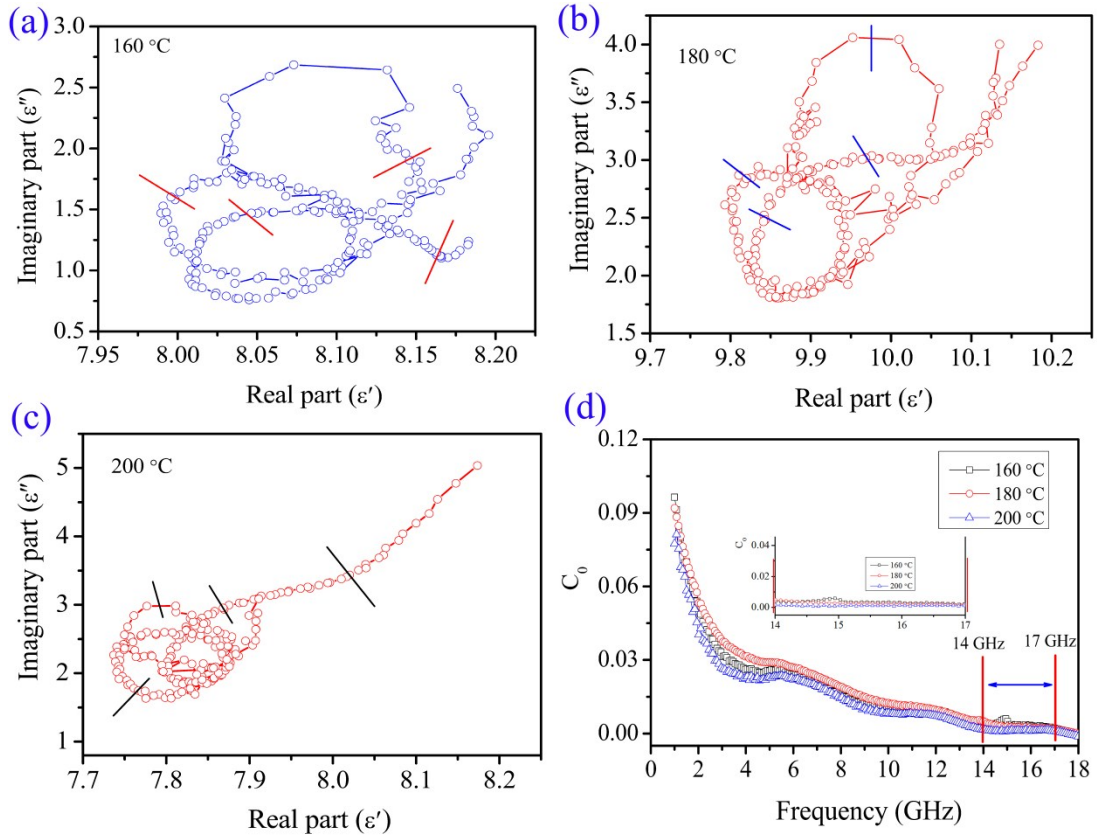

Fig. S1 (a-c) The relation between real part ( $\epsilon'$ ) and imaginary part ( $\epsilon''$ ), and (d) Frequency dependence of  $C_0$  ( $C_0 = \mu''(\mu')^{-2} f^{-1}$ ) for three Al-Ni@Ni-160, Al-Ni@Ni-180 and Al-Ni@Ni-200 samples; Inset in Fig.S1d is the zoomed-up image of  $C_0$  in the frequency of 14-17 GHz.

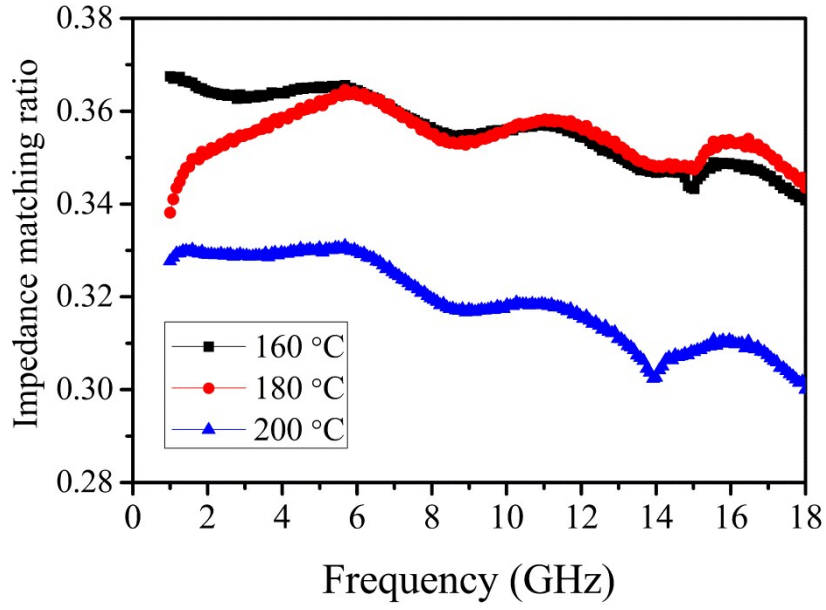

Fig.S2 Frequency dependence of impedance matching ratio ( $Z_r = Z_{in}/Z_0$ ) of Al-Ni@Ni products prepared at different hydrothermal temperatures

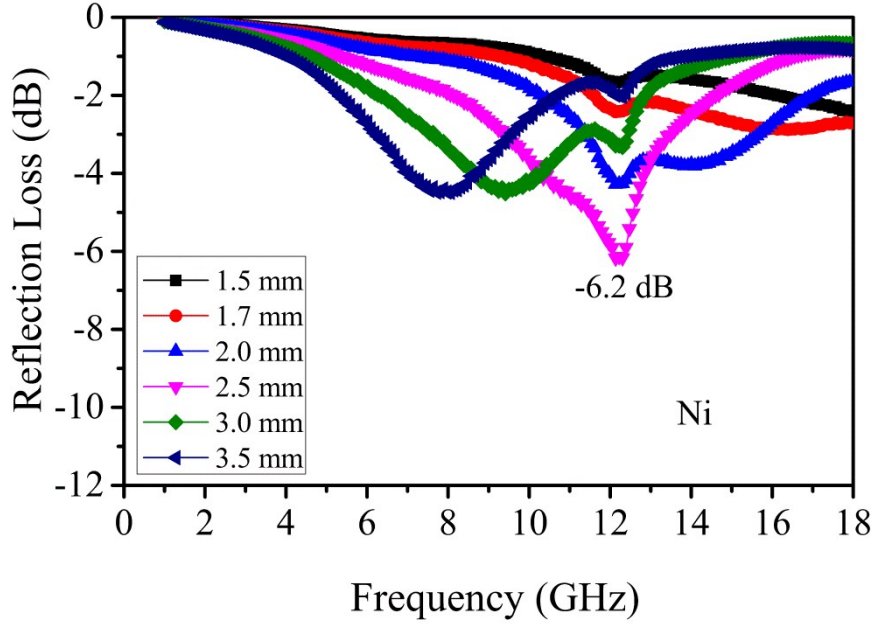

Fig.S3 Calculated reflection loss of bare Ni microspheres with different thicknesses
